# Supplementary material for: OLEDs on Down-Converting Fabric by Using a High Scalable Planarization Process and a Transparent Polymeric Electrode
Source: MDPI journal article supplement (doi:10.3390/textiles4010007), 2024-02-15
Supplement: s1 [file s1]

# OLEDs on Down-Converting Fabric by Using a High Scalable Planarization Process and a Transparent Polymeric Electrode

Carmela Tania Prontera <sup>1</sup>, Marco Pugliese <sup>1,2,\*</sup>, Fabrizio Mariano <sup>2</sup>, Daniela Taurino <sup>3</sup>, Roberto Giannuzzi <sup>1,3</sup>, Vitantonio Primiceri <sup>3</sup>, Marco Esposito <sup>1</sup>, Antonio Andretta <sup>2</sup>, Giuseppe Gigli <sup>1,4</sup> and Vincenzo Maiorano <sup>1</sup>

<sup>1</sup> CNR-NANOTEC-Institute of Nanotechnology, c/o Campus Ecotekne, Via Monteroni, 73100 Lecce, Italy

<sup>2</sup> Klopman International Srl, Via Armando Vona 34, 03100 Frosinone, Italy

<sup>3</sup> Department of Mathematics and Physics, University of Salento, via Monteroni, 73100 Lecce, Italy

<sup>4</sup> Department of Sperimental Medicine, University of Salento, c/o Campus Ecotekne, Via Monteroni, 73100 Lecce, Italy

\* Correspondence: marco.pugliese@nanotec.cnr.it

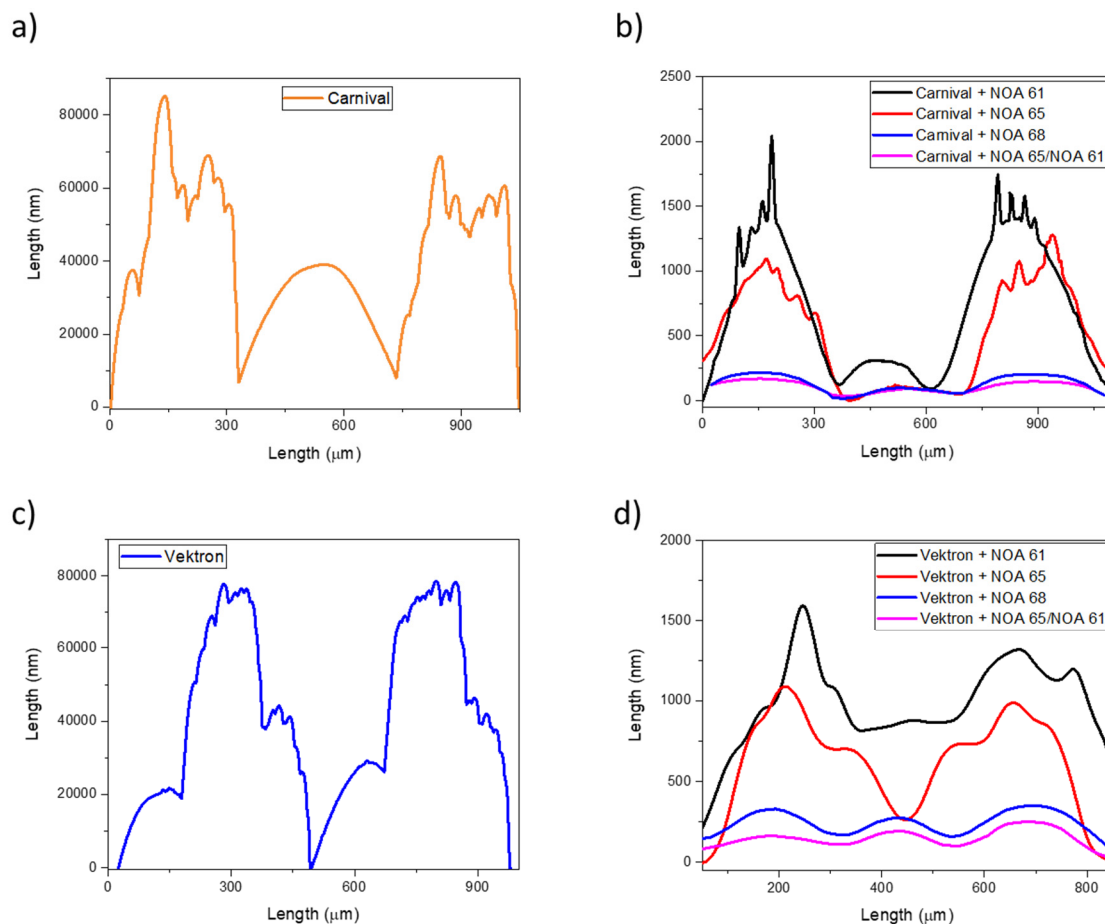

**Figure S1.** Profilometer scans of: Carnival fabric before (a) and after planarization (b); Vektron fabric before (c) and after planarization (d).

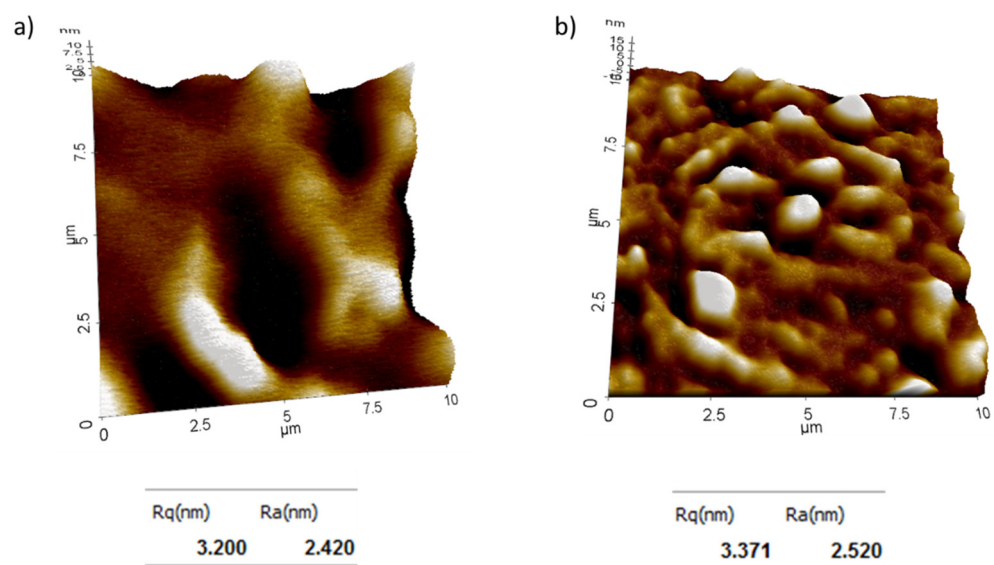

**Figure S2.** AFM images of Carnival fabric planarized with NOA 65/NOA 61 (a) and Vektron fabric planarized with NOA 65/NOA 61 (b).
